# Supplementary material for: Comparative transcriptome analysis of two selenium-accumulating genotypes of Aegilops tauschii Coss. in response to selenium
Source: BMC Genet. 2019 Jan 14;20:9. doi: 10.1186/s12863-018-0700-1 (PMC6332533; doi:10.1186/s12863-018-0700-1)
Supplement: Supplementary file 11 — Data S8. Characteristic transcription factor genes list between comparison groups. (XLS 46 kb) [file 12863_2018_700_MOESM11_ESM.xls]

## Sheet: CK1 VS CK2
	Group	Gene ID	Description	CK1 FPKM	CK2 FPKM	Fold change
1	bHLH	Traes_2DL_8BE259F4B	Transcription factor bHLH35	8.265	25.91	3.13491
2		Traes_2DS_FE62DB7F5	Transcription factor bHLH47	84.075	168.543	2.00468
3		Traes_7DS_34DB6B305	Transcription factor bHLH78	1.89	16.48	8.71958
4		XLOC_045926	Transcription factor bHLH78	4.07	54.9367	13.498
5	MYB	Traes_1DS_5BAD8947E	Transcription factor MYB86	0.37	15.0233	40.6036
6		Traes_2DS_3569AEDFB	Transcription factor MYB86	1.375	43.9667	31.9758
7		Traes_5DS_8F3BD4450	Myb transcription factor	1.775	62.0033	34.9315
8		Traes_2DL_7B1FE2F5B	Myb family transcription factor APL	24.615	11.1	0.450945
9	WRKY	Traes_5DL_09F1F8F79	WRKY transcription factor 55	11.01	39.92	3.62579
10		Traes_7DL_5968FA56C	WRKY transcription factor 23, partial	13.8	44.6	3.23188
Note: Bold font, the down–regulated genes.

## Sheet: CK1 VS T1
	Group	Gene ID	Description	CK1 FPKM	T1 FPKM	Fold change
1	MYB	XLOC_006616	Myb family transcription factor APL	44.25	30.46	0.69
2	AP2	XLOC_040922	AP2/EREBP type transcription factor	43	28.89	0.67
Note: Bold font, the down–regulated genes.

## Sheet: CK2 VS T2
	Group	Gene ID	Description	CK2 FPKM	T2 FPKM	Fold change
1	NAC	XLOC_004728	NAC domain-containing protein 74	0.001	14.97
2	S1Fa-like	Traes_1DS_BC52BD286	Lectin-domain containing receptor kinase A4.2	5.52	12.97	2.34964
3	LBD	Traes_2DL_9D8B5B436	PREDICTED: LOB domain-containing protein 41-like	14.69	38.07	2.59156
4	WRKY	XLOC_001916	WRKY transcription factor 55	9.38	22.44	2.39232
5	MYB	Traes_5DS_8F3BD4450	Myb transcription factor	62	17.87	0.288226
6	bZIP	Traes_1DS_FFEF78B03	multiple C2 and transmembrane domain-containing protein 2-like	38.11	4.65	0.122015
Note: Bold font, the down–regulated genes.

## Sheet: T1 VS T2
	Group	Gene ID	Description	T1 FPKM	T2 FPKM	Fold change
1	AP2	XLOC_042513	AP2-like ethylene-responsive transcription factor At1g16060	0.001	13.92
2	bHLH	Traes_2DL_07B630B0C	transcription factor FER-like iron deficiency-induced transcription factor-like	6.97	42.39	6.08178
3		Traes_2DL_BDB1CAB26	Transcription factor FER-like iron deficiency-induced transcription factor	1.84	11.98	6.51087
4		Traes_2DL_DE3909A32	transcription factor bHLH35-like	2.72	19.13	7.03309
5		Traes_4DS_51AD22B85	transcription factor bHLH34-like	10.76	23.2	2.15613
6		Traes_4DL_0075CCAD9	Transcription factor bHLH93	0	12.86
7	bZIP	Traes_4DL_6063F821A	zinc-finger transcription factor, partial	10.37	21.3	2.054
8	HSF	Traes_5DL_431CCA490	Heat stress transcription factor B-1	17.39	52.35	3.01035
9		XLOC_005238	heat stress transcription factor A-3-like isoform X1	12.91	0.34	0.0263362
10	NAC	Traes_5DL_36AE1EF2B	TPA: NAC transcription factor, partial	82.45	178.04	2.15937
11	WRKY	Traes_2DS_0F2500A60	WRKY transcription factor	15.71	38.53	2.45258
12		XLOC_005223	WRKY transcription factor 4, partial	8.08	38.75	4.79579
13		XLOC_023929	probable WRKY transcription factor 72-like	3.62	12.96	3.58011
14		XLOC_001916	WRKY transcription factor 55	0.59	22.44	38.0339
15		XLOC_038367	probable WRKY transcription factor 70	15.04	35.15	2.3371
16		Traes_4DS_CFC487CE5	probable WRKY transcription factor 2	152.44	62.09	0.407308
17		Traes_6DS_BF71C1557	WRKY transcription factor 3	14.13	3.83	0.271054
Note: Bold font, the down–regulated genes.
